# Supplementary material for: The Intrarenal Renin-angiotensin System Is Activated Immediately after Kidney Donation in Kidney Transplant Donors
Source: PubMed Central journal article supplement — Intern Med. 2018 Oct 17;58(5):643–8. doi: 10.2169/internalmedicine.1756-18 (PMC6443563; doi:10.2169/internalmedicine.1756-18), 2018-10-17
Supplement: 1349-7235-58-0643-s001.pdf [file 1349-7235-58-0643-s001.pdf]

**Suppl Table 1:** Relationships between high-sensitivity C-reactive protein (hs-CRP) and clinical parameters after kidney donation

|                     | r      | p value |
|---------------------|--------|---------|
| Body mass index     | -0.067 | 0.86    |
| SBP                 | 0.21   | 0.55    |
| DBP                 | 0.29   | 0.43    |
| MBP                 | 0.24   | 0.50    |
| Heart rate          | 0.27   | 0.45    |
| eGFR                | -0.61  | 0.065   |
| Plasma AGT          | 0.30   | 0.40    |
| Plasma AngII        | 0.18   | 0.62    |
| Log urinary AGT     | 0.58   | 0.10    |
| Log urinary Alb/day | 0.11   | 0.78    |

SBP; systolic blood pressure, DBP; diastolic blood pressure, MBP; mean blood pressure, eGFR; estimated glomerular filtration rate, AGT; angioteninogen, AngII; angiotensin II, Alb; albumin
