# Supplementary material for: The Intrarenal Renin-angiotensin System Is Activated Immediately after Kidney Donation in Kidney Transplant Donors
Source: PubMed Central journal article supplement — Intern Med. 2018 Oct 17;58(5):643–8. doi: 10.2169/internalmedicine.1756-18 (PMC6443563; doi:10.2169/internalmedicine.1756-18), 2018-10-17
Supplement: 1349-7235-58-0643-s002.pdf [file 1349-7235-58-0643-s002.pdf]

**Supple Table 2** Relationships of percentage changes in high-sensitivity C-reactive protein (hs-CRP) levels and clinical parameters between pre-operation and post-operation

|                      | r      | p value |
|----------------------|--------|---------|
| ΔBody mass index     | 0.30   | 0.40    |
| ΔSBP                 | 0.017  | 0.96    |
| ΔDBP                 | 0.32   | 0.40    |
| ΔMBP                 | 0.079  | 0.83    |
| ΔHeart rate          | 0.30   | 0.40    |
| ΔeGFR                | -0.77  | <0.01   |
| ΔPlasma AGT          | -0.029 | 0.94    |
| ΔPlasma AngII        | -0.19  | 0.62    |
| ΔLog urinary AGT/day | 0.64   | 0.087   |
| ΔLog urinary Alb/day | 0.38   | 0.41    |

SBP; systolic blood pressure, DBP; diastolic blood pressure, MBP; mean blood pressure, eGFR; estimated glomerular filtration rate, AGT; angioteninogen, AngII; angiotensin II, Alb; albumin
